# Supplementary material
Source: Royal Society of Chemistry journal article supplement (doi:10.1039/d6ay00311g)
Supplement: d6ay00311g1.pdf [file d6ay00311g1.pdf]

## Ratiometric fluorescence determination of Gd(III) using plumbagin: method validation and analysis of real samples

Do Tam Nhan<sup>a</sup>, Le Van Tan<sup>b\*</sup>, Le Thi Thanh Tran<sup>c</sup>, Nguyen Le Anh<sup>a</sup>, Pham Van Tat<sup>d</sup>

<sup>a</sup>*The Dalat Nuclear Research Institute, Vietnam Atomic Energy Institute, Vietnam*

<sup>b</sup>*Chemical Engineering Faculty, Industrial University of Ho Chi Minh City, Ho Chi Minh City 700000, Vietnam.*

<sup>c</sup>*Faculty of Chemistry and Environment, Dalat University, Lam Dong Province 670000, Vietnam*

<sup>d</sup>*Institute of Pharmaceutical Education and Research, Binh Duong University, Thu Dau Mot City, 820000, Binh Duong, Vietnam*

\*Corresponding author: [levantan@iuh.edu.vn](mailto:levantan@iuh.edu.vn) (Orchid: <https://orcid.org/0000-0002-1935-2183>)

**Table 1S.** Optimized operating parameters of the ICP-MS (PerkinElmer NexION 300X)

| Operating Parameter                | Measured Value |
|------------------------------------|----------------|
| Nebulizer gas flow STD/KED (L/min) | 0.85           |
| Auxiliary gas flow (L/min)         | 1.40           |
| Plasma gas flow (L/min)            | 11.0           |
| Deflector voltage (V)              | -9.50          |
| ICP RF power (W)                   | 1350           |
| Analog stage voltage (V)           | -1700          |
| Pulse stage voltage (V)            | 900            |
| KED cell gas A (L/min)             | 0.42           |
| DRC cell gas A (L/min)             | 0.60           |

**Table 2S.** Selected isotopes of rare earth elements for ICP-MS analysis

| <b>No.</b> | <b>Element</b> | <b>Symbol</b> | <b>Isotope</b> |
|------------|----------------|---------------|----------------|
| 1          | Scandium       | Sc            | 45             |
| 2          | Yttrium        | Y             | 89             |
| 3          | Lanthanum      | La            | 139            |
| 4          | Cerium         | Ce            | 140            |
| 5          | Praseodymium   | Pr            | 141            |
| 6          | Neodymium      | Nd            | 142            |
| 7          | Samarium       | Sm            | 152            |
| 8          | Europium       | Eu            | 153            |
| 9          | Gadolinium     | Gd            | 157            |
| 10         | Terbium        | Tb            | 159            |
| 11         | Dysprosium     | Dy            | 164            |
| 12         | Holmium        | Ho            | 165            |
| 13         | Erbium         | Er            | 166            |
| 14         | Thulium        | Tm            | 169            |
| 15         | Ytterbium      | Yb            | 174            |
| 16         | Lutetium       | Lu            | 175            |

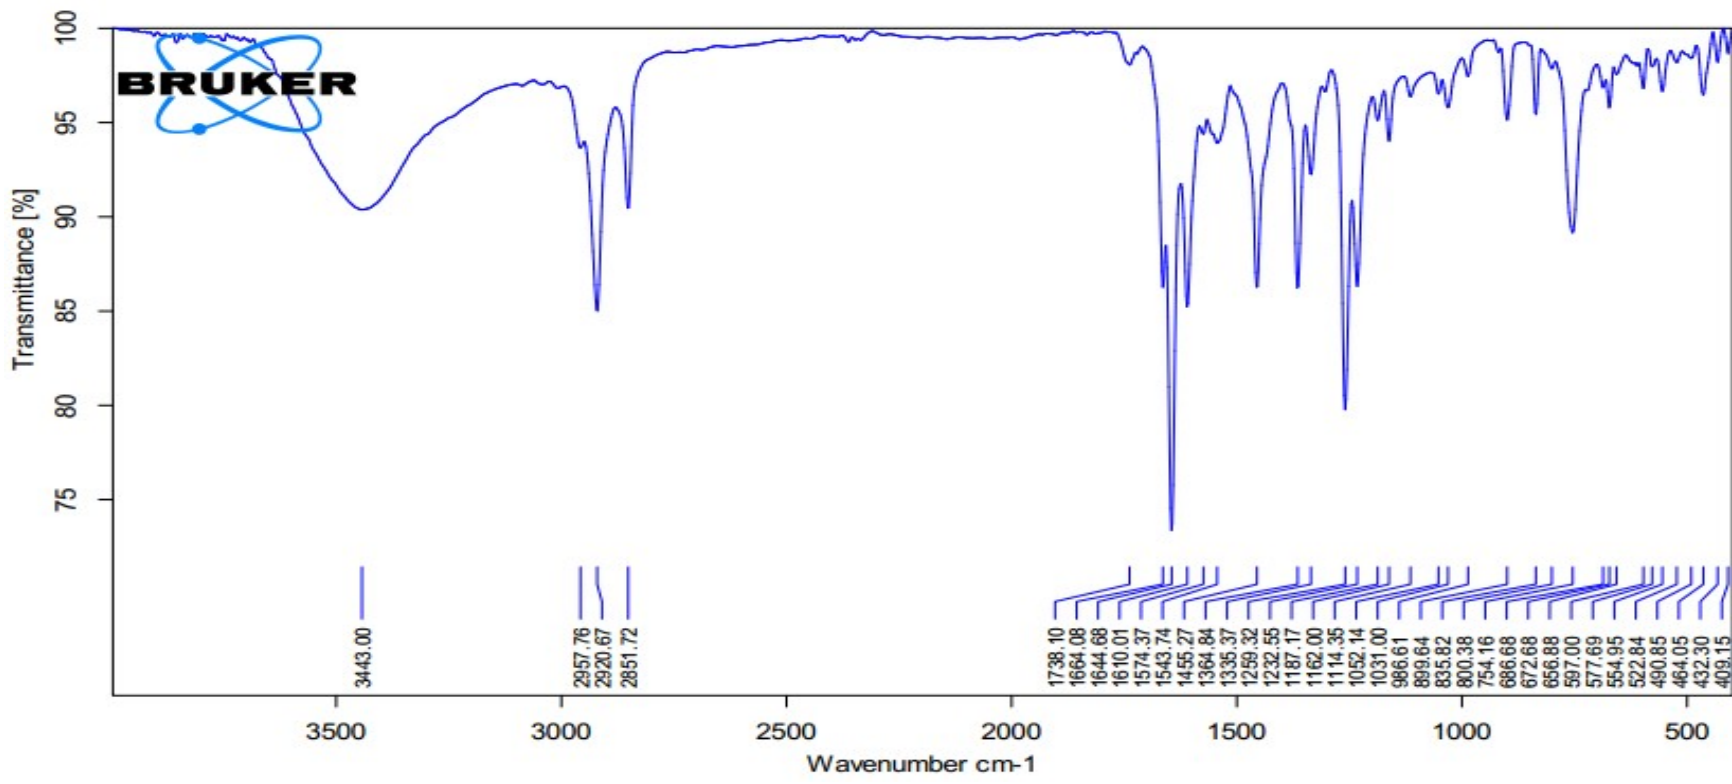

*Figure 1S. The FT-IR spectrum of the Gd-PLB complex*

PLB-Gd-MeOD.1.1.1r  
PLB-Gd-MeOD-1H

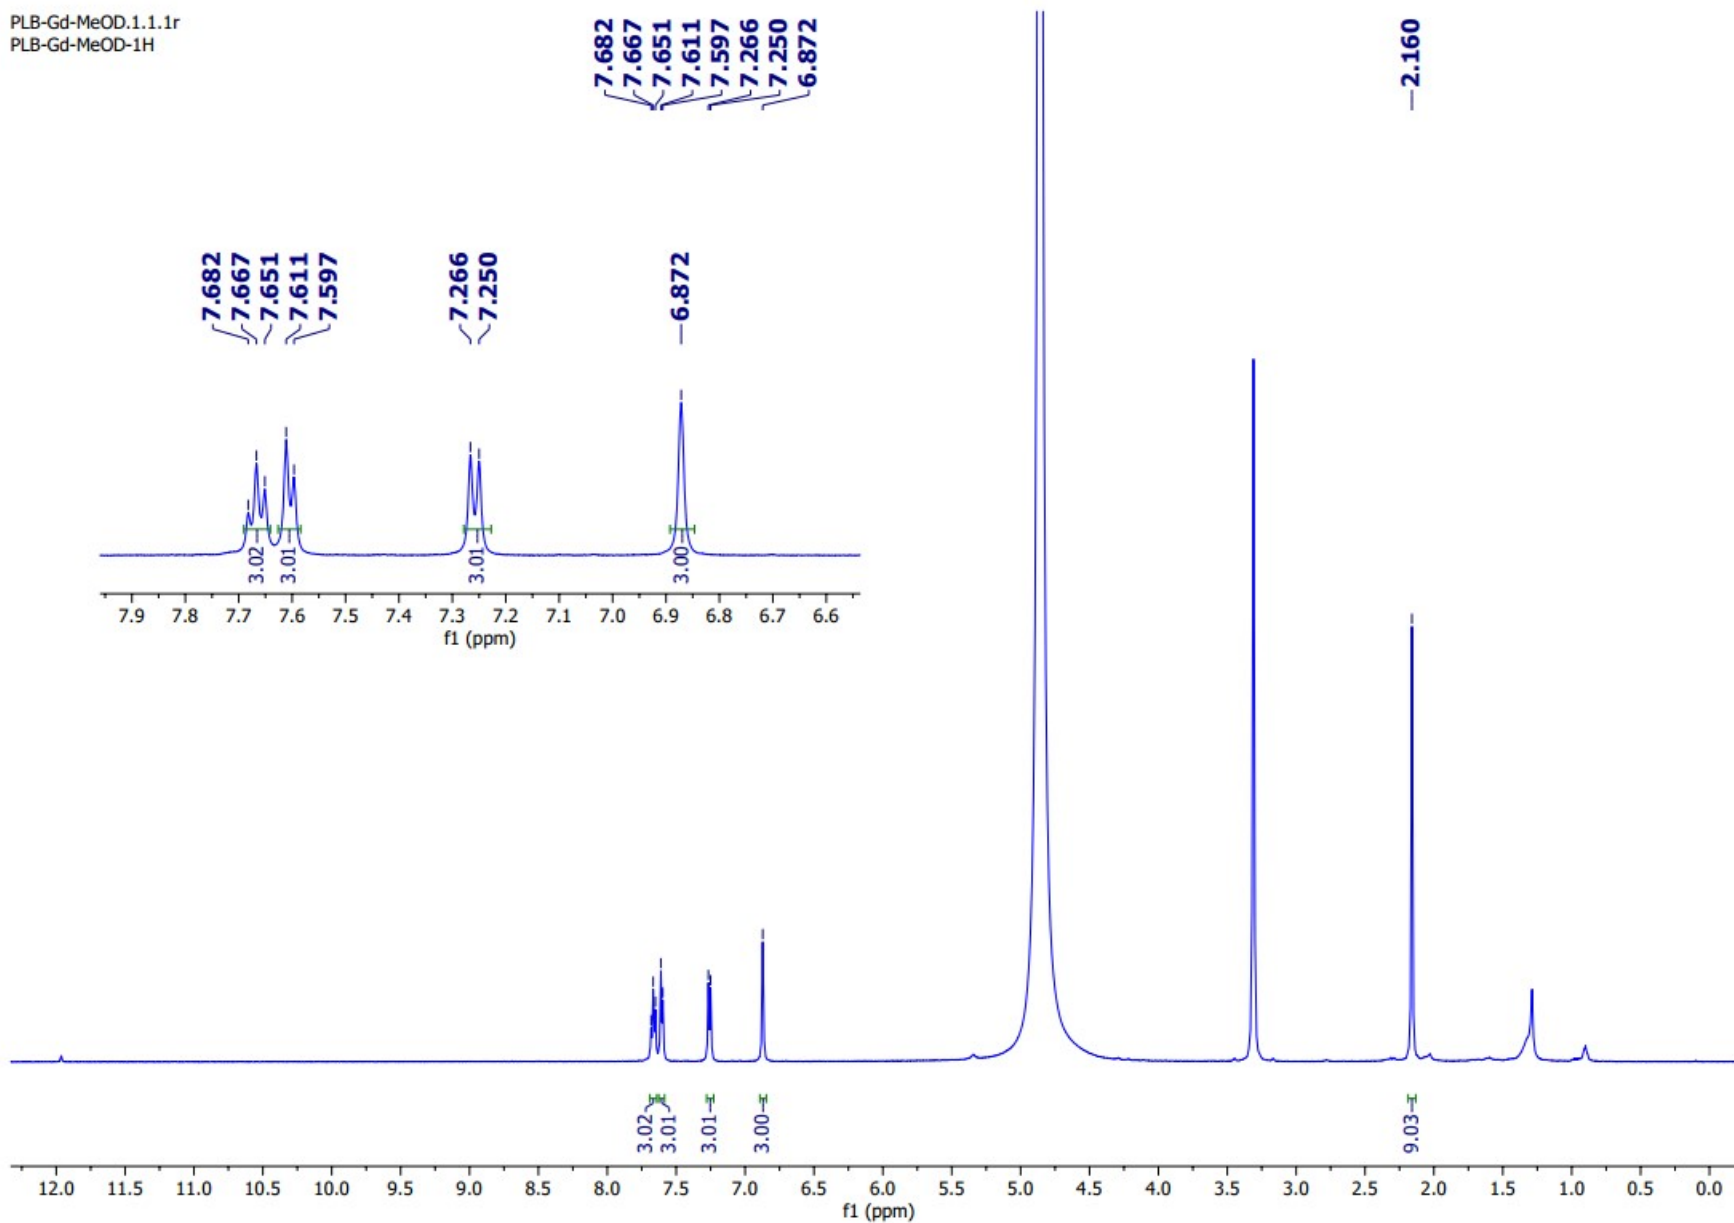

**Figure 2S.** The  $^1\text{H-NMR}$  spectrum of Gd-PLB complex in solid phase

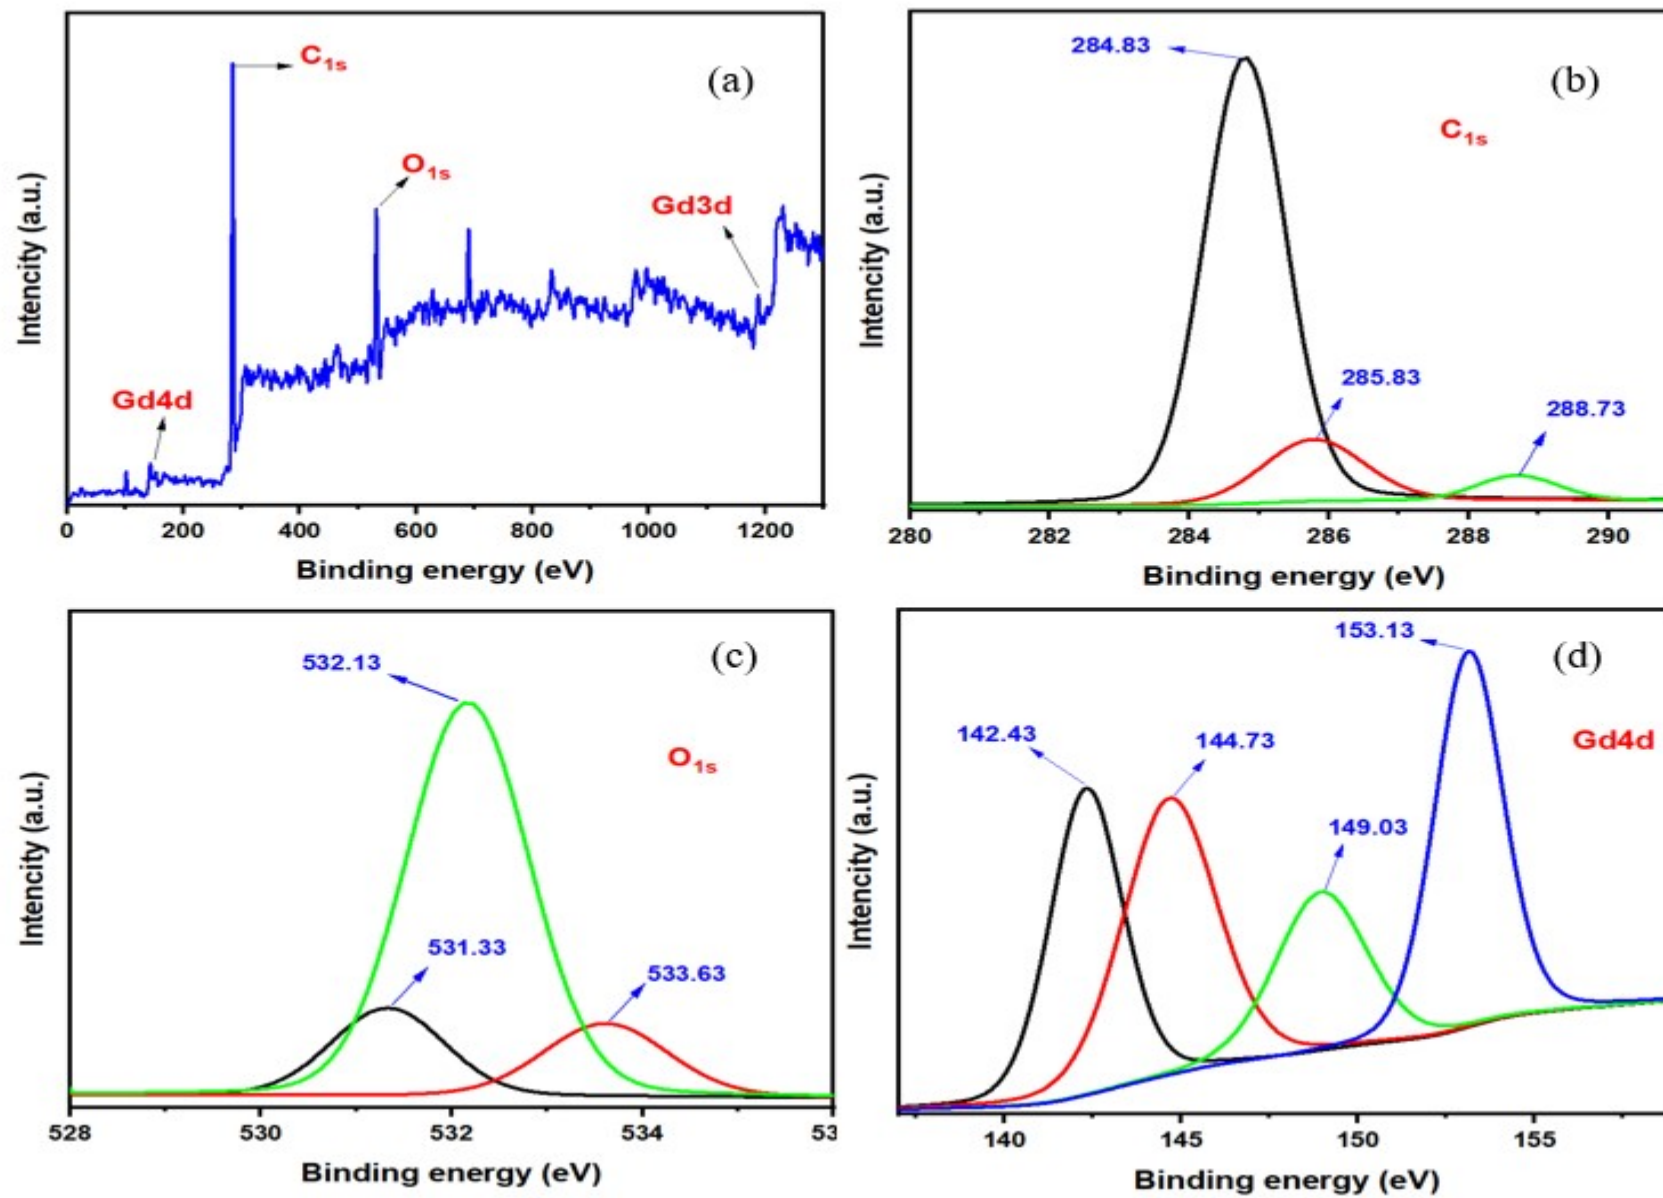

Figure 3S. The XPS spectrum of Gd-PLB complex in solid phase

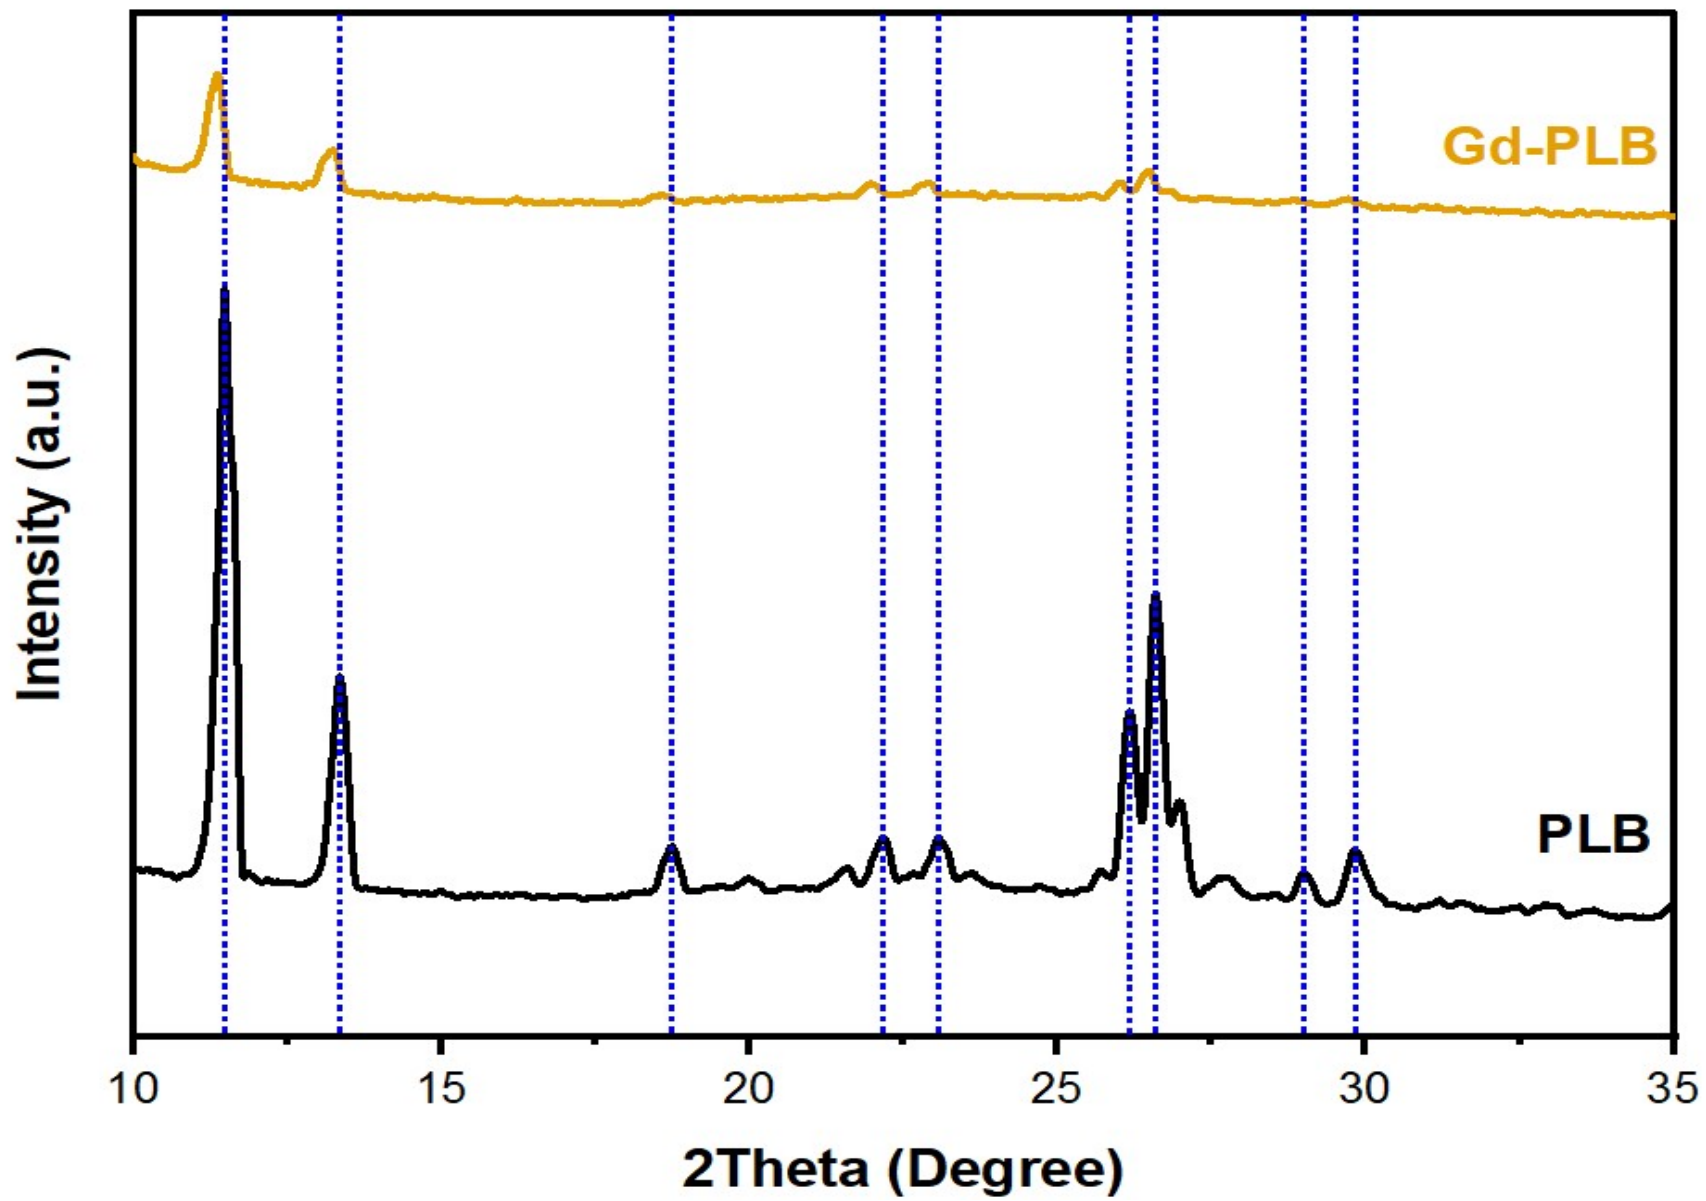

*Figure 4S.* The XRD spectrum of Gd-PLB complex in solid phase

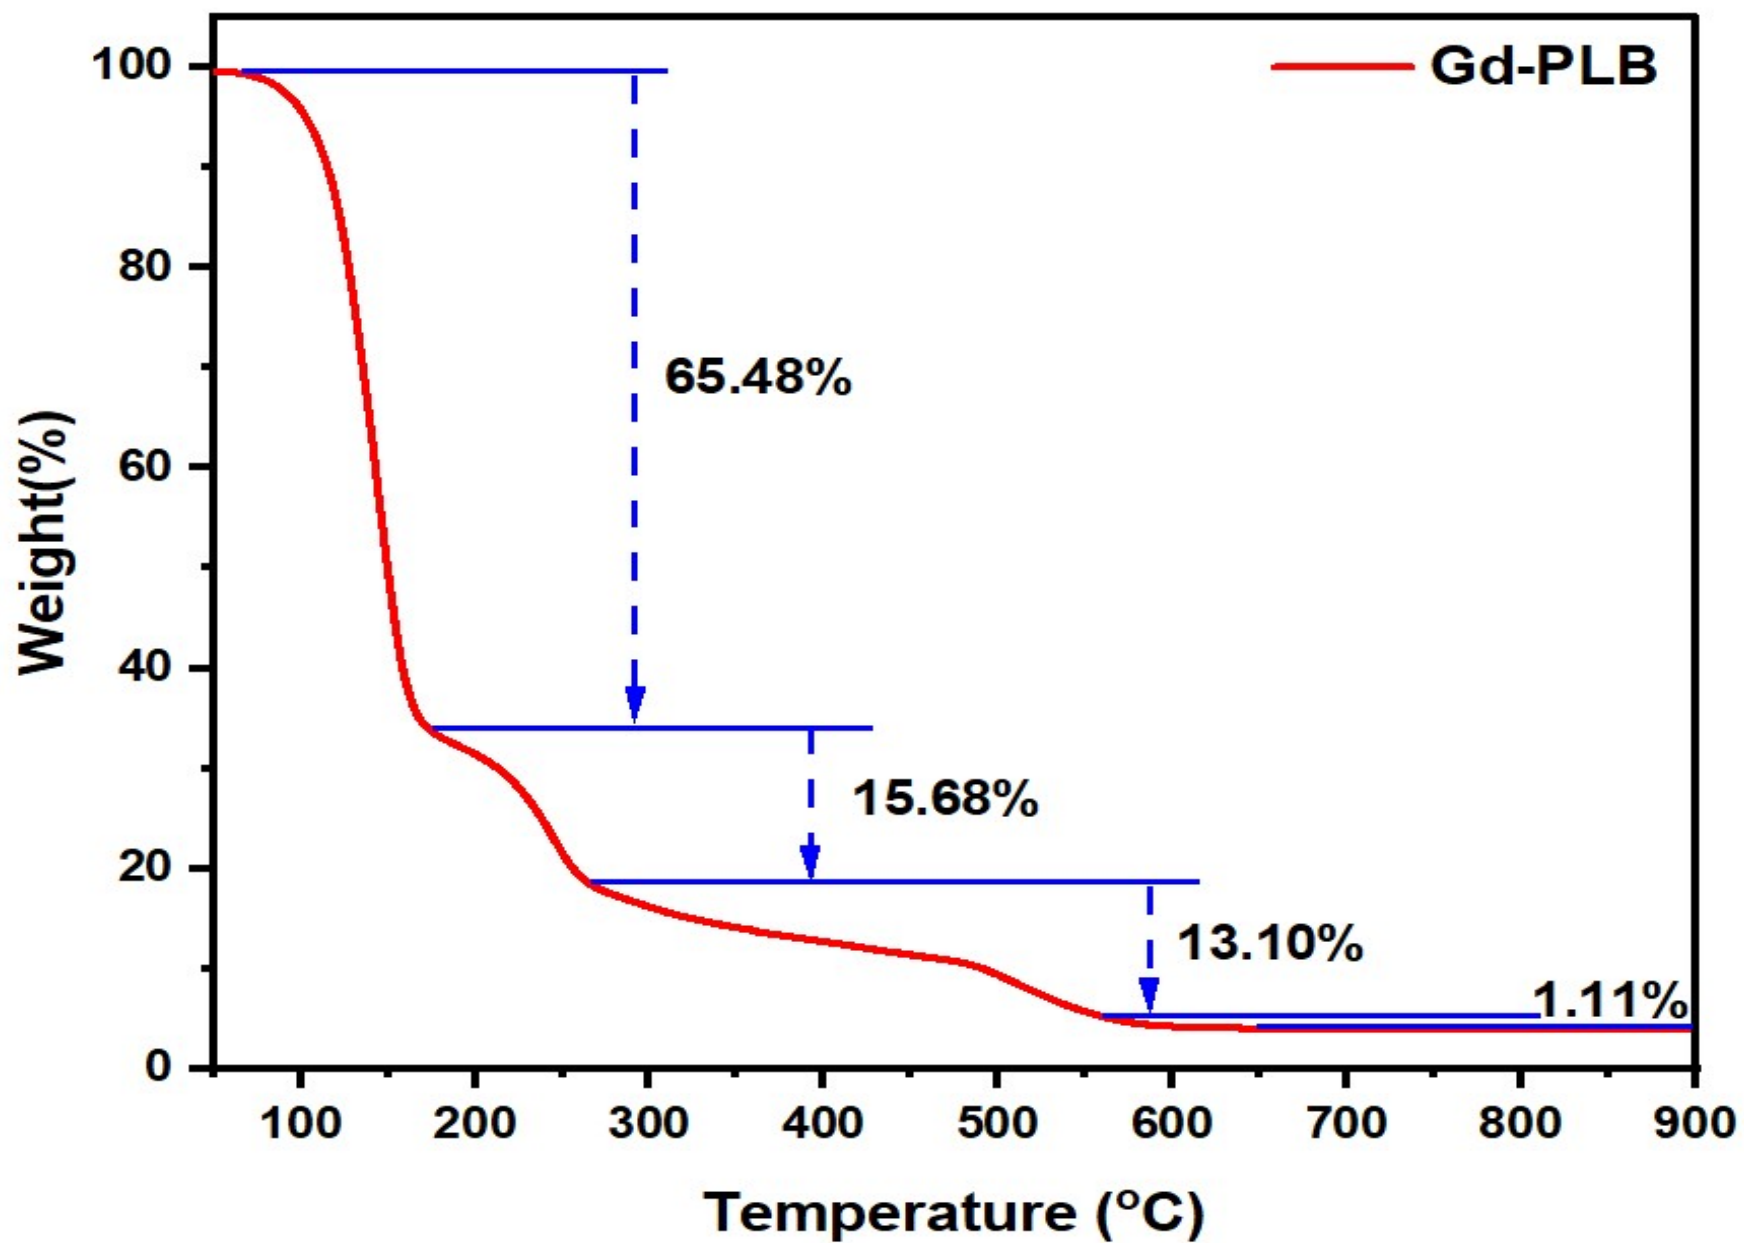

*Figure 5S. The TGA spectrum of Gd-PLB complex in solid phase*

Smp\_002

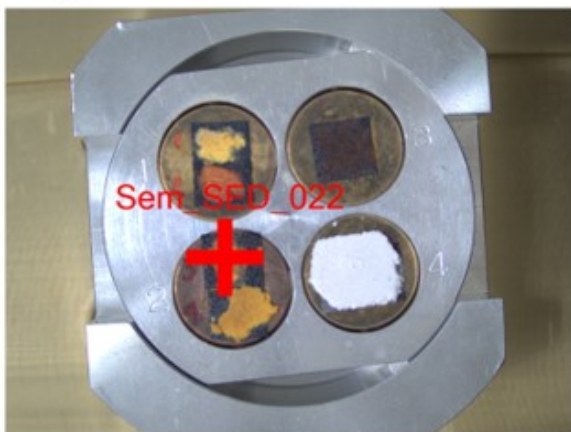

5 mm

Sem\_SED\_022

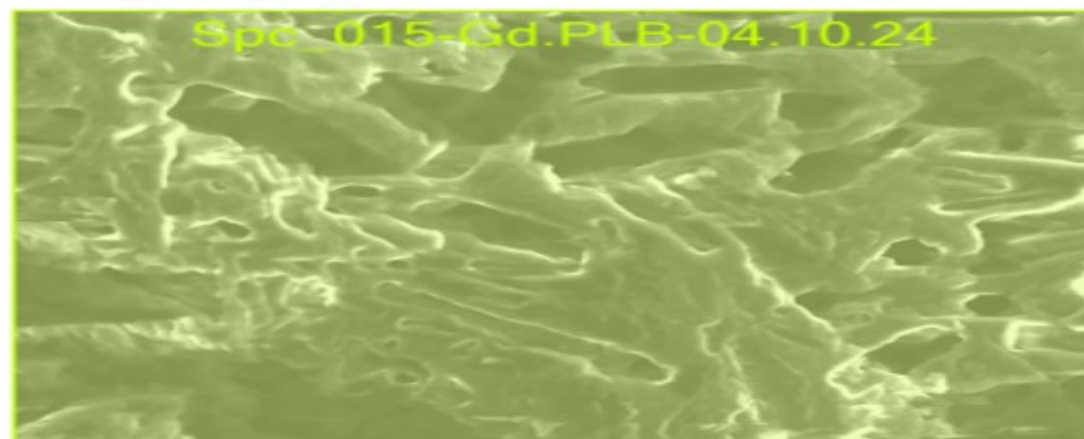

10 μm

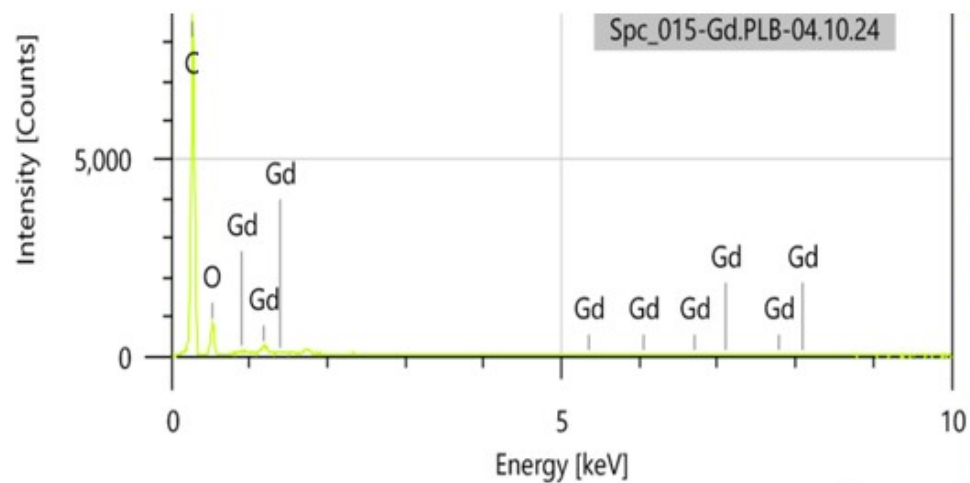

| Element | Line | Mass%        | Atom%        |
|---------|------|--------------|--------------|
| C       | K    | 76.72 ± 0.31 | 83.9 ± 0.34  |
| O       | K    | 19.2 ± 0.45  | 15.76 ± 0.37 |
| Gd      | K    | 4.08 ± 0.32  | 0.34 ± 0.03  |
| Total   |      | 100.00       | 100.00       |

Figure 6S. SEM-EDS of Gd-PLB complex in solid phase

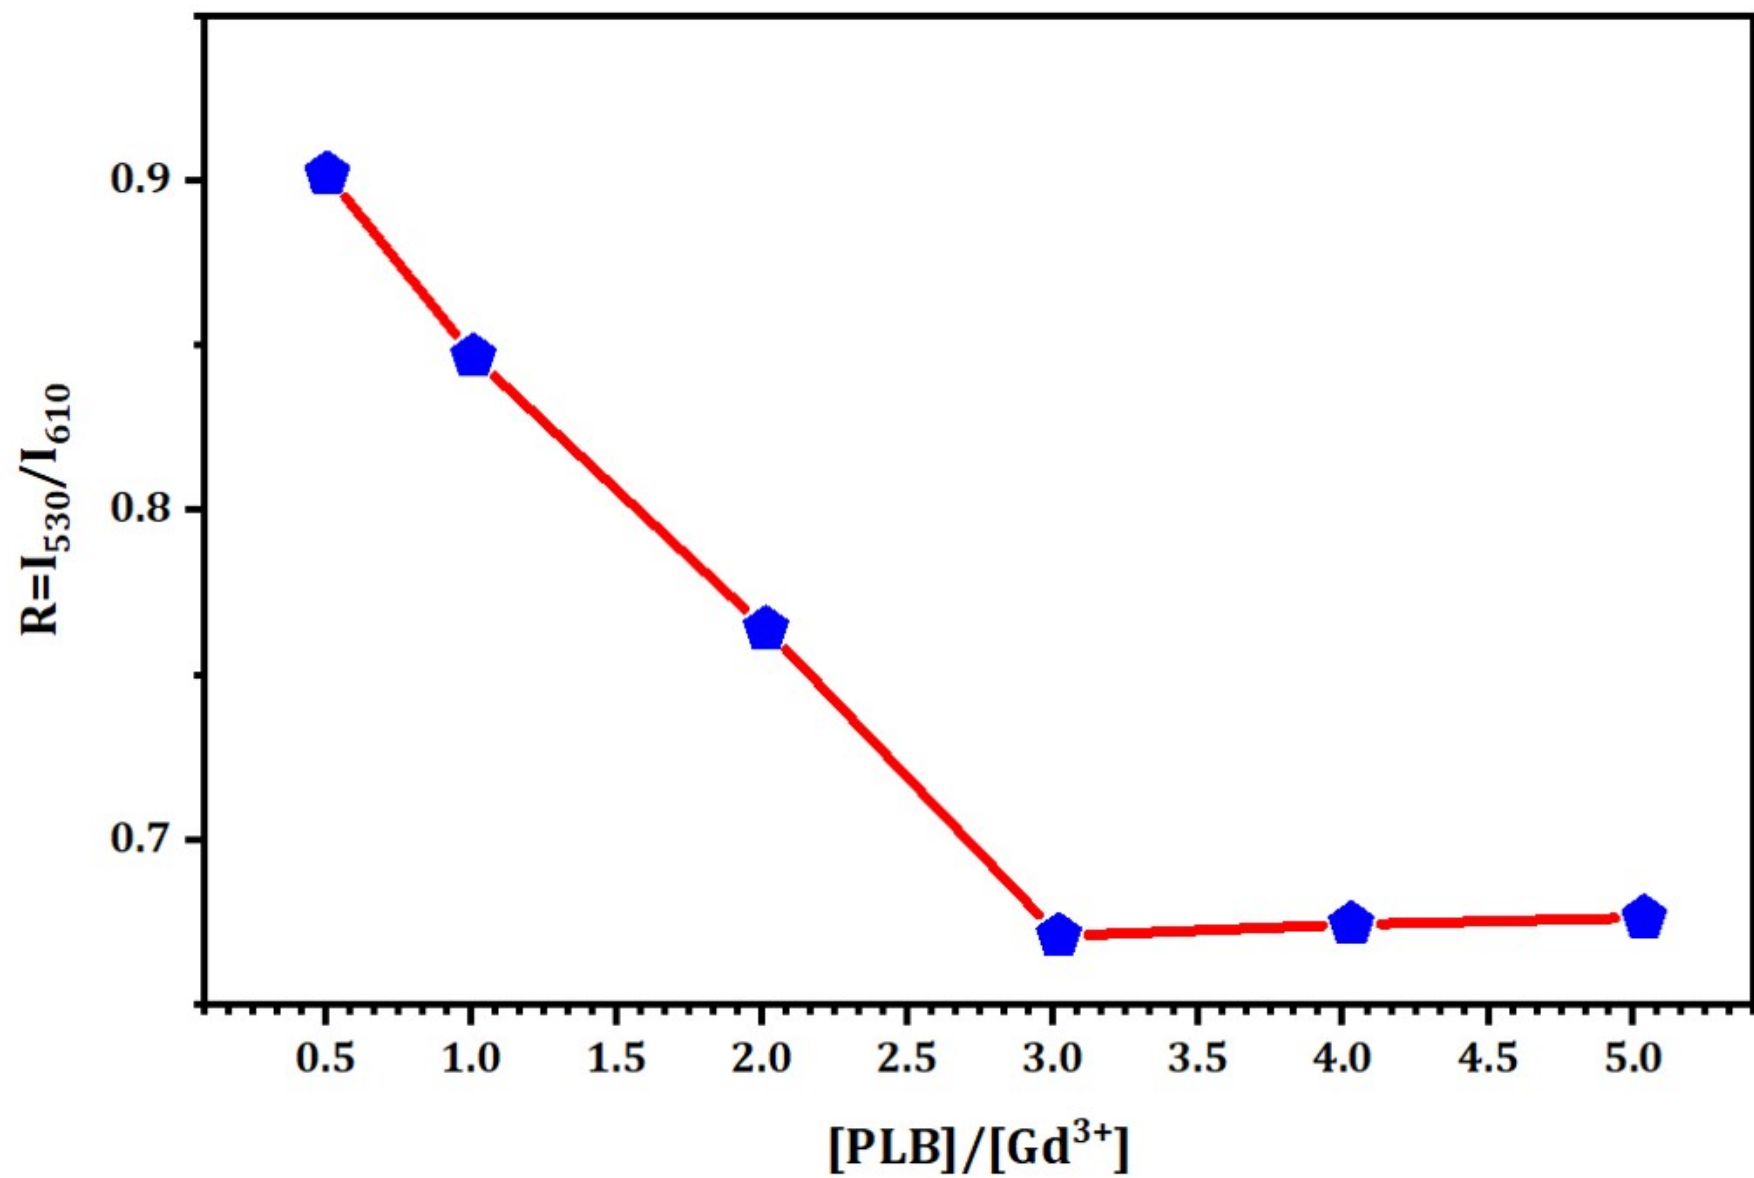

Figure 7S. The molar ratio plot

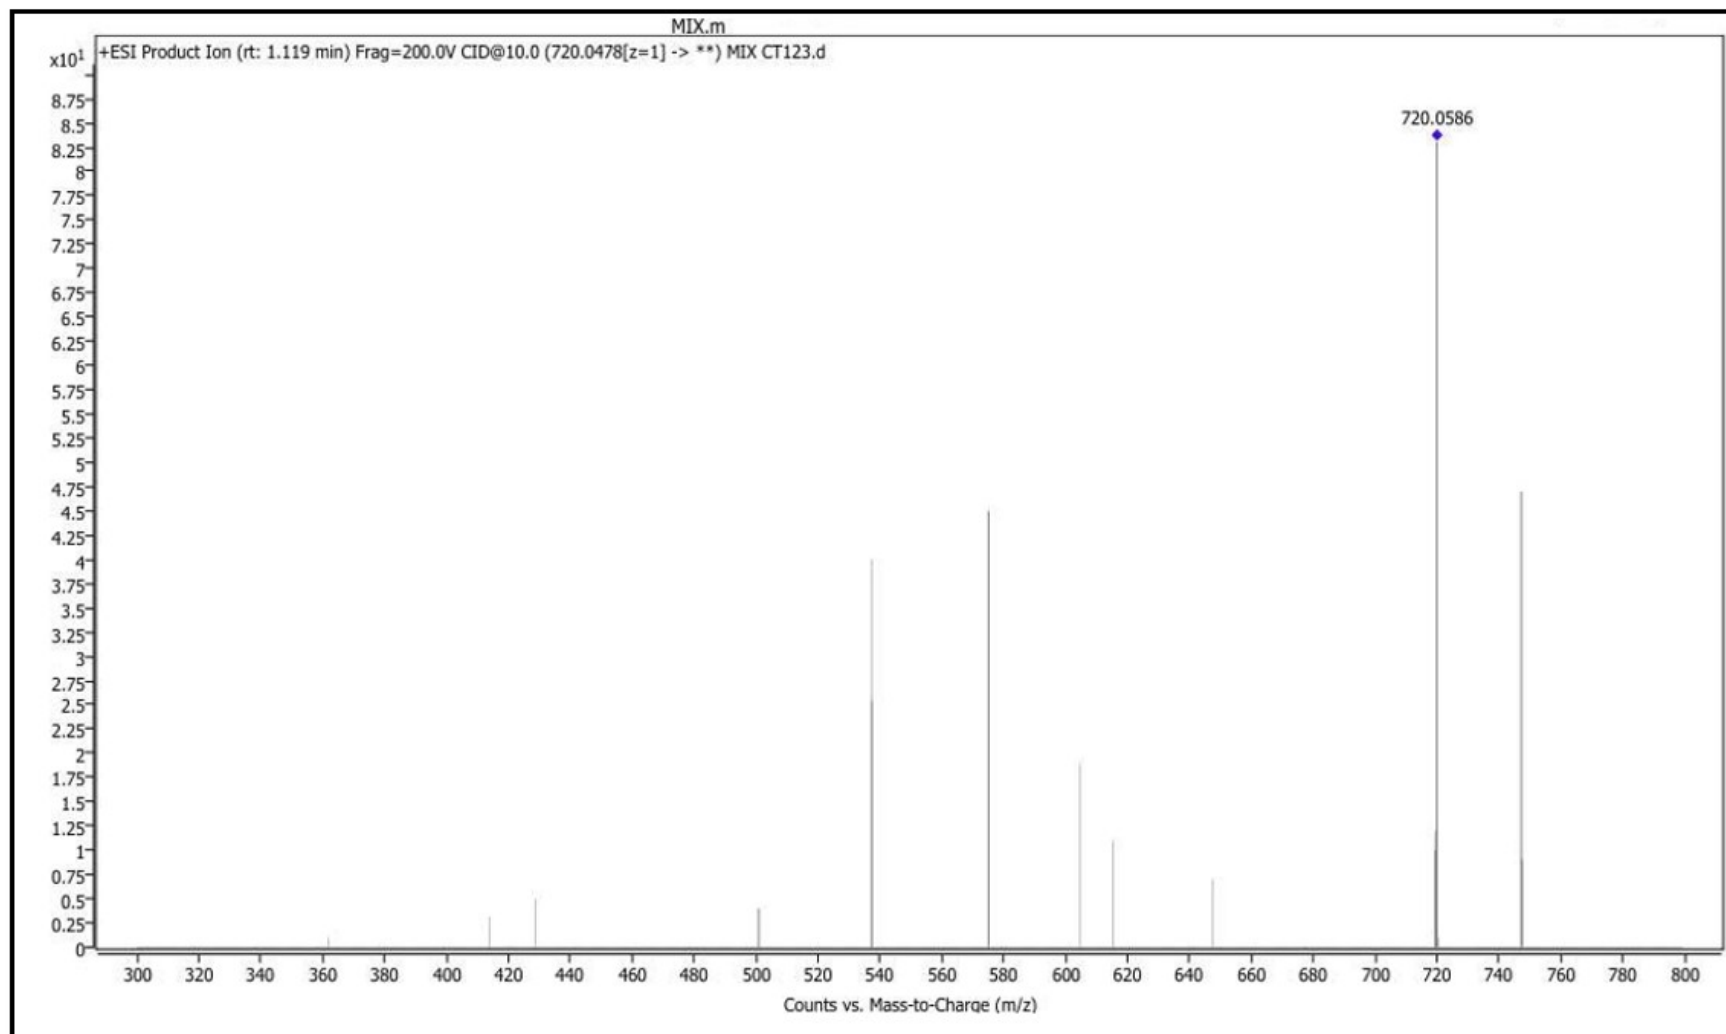

Figure 8S. The ESI-MS spectrum of  $Gd(PLB)_3$  complex in solid phase

**Table 3S.** GY-AGREE assessment for the Gd-PLB fluorescence method

| <b>Criterion (12 Principles of Green Analytical Chemistry)</b> | <b>Brief description</b>                   | <b>Evaluation for the Gd-PLB</b>                                                       | <b>Score</b> |
|----------------------------------------------------------------|--------------------------------------------|----------------------------------------------------------------------------------------|--------------|
| Sample preparation                                             | Minimal sample preparation                 | Simple dissolution and direct fluorescence measurement                                 | 0.7          |
| Sample size                                                    | Low sample consumption                     | Only ~3 mL per measurement, no digestion required                                      | 0.8          |
| Reagent consumption                                            | Reduced use of hazardous reagents/solvents | Mixed solvent ACN:H <sub>2</sub> O (2:3 v/v); no strong acids or bases used            | 0.5          |
| Waste generation                                               | Minimal waste generation                   | No solid waste; aqueous waste easily diluted and disposed                              | 0.7          |
| Energy consumption                                             | Low energy consumption                     | Performed at room temperature without heating or intense light source                  | 0.85         |
| Automation and miniaturization                                 | Use of eco-friendly materials              | Standard glassware and quartz cuvette; no disposable plastics                          | 0.6          |
| Operator safety                                                | Operator safety                            | No toxic gases or corrosive or flammable reagents involved                             | 0.85         |
| Instrumental energy efficiency                                 | Non-toxic reagents                         | PLB is a natural compound; Gd <sup>3+</sup> used at low concentration                  | 0.8          |
| Method greenness in terms of reagents and solvents             | High selectivity minimizing pretreatment   | Highly selective toward Gd <sup>3+</sup> with negligible interference from common ions | 0.85         |
| Waste treatment and recyclability                              | Adequate sensitivity and accuracy          | Low LOD/LOQ; excellent agreement with ICP-MS results                                   | 0.78         |
| Analytical throughput                                          | Low-energy instrumentation                 | Fluorometer with low power consumption                                                 | 0.7          |
| Overall environmental impact                                   | Potential for automation or reusability    | Compatible with flow-injection systems or reusable sensors                             | 0.8          |

Average score: 0.74 - Overall assessment: good level of analytical greenness

**Table 4S.** Eco-Scale Scores for the Assessment of the Greenness of the Gd-PLB Fluorescence Method

| <b>Parameter</b>             | <b>Penalty Points</b> | <b>Justification/Notes</b>               |
|------------------------------|-----------------------|------------------------------------------|
| Consumables (reagents, tips) | 2                     | Small consumption of consumables         |
| Buffer/salts hazard          | 1                     | Moderate hazard from buffers and salts   |
| Energy consumption           | 1                     | Low-energy operation                     |
| Organic waste volume         | 5                     | Volume of organic waste generated        |
| Acetonitrile usage           | 10                    | Use of acetonitrile (high hazard)        |
| Total penalty Points         | 19                    |                                          |
| Eco-Scale Score              | 81                    | Calculated as 100 - total penalty points |

Eco-Scale Score = 100 – Total Penalty Points.

Scores  $\geq 75$  are considered “excellent” in terms of green analytical chemistry.

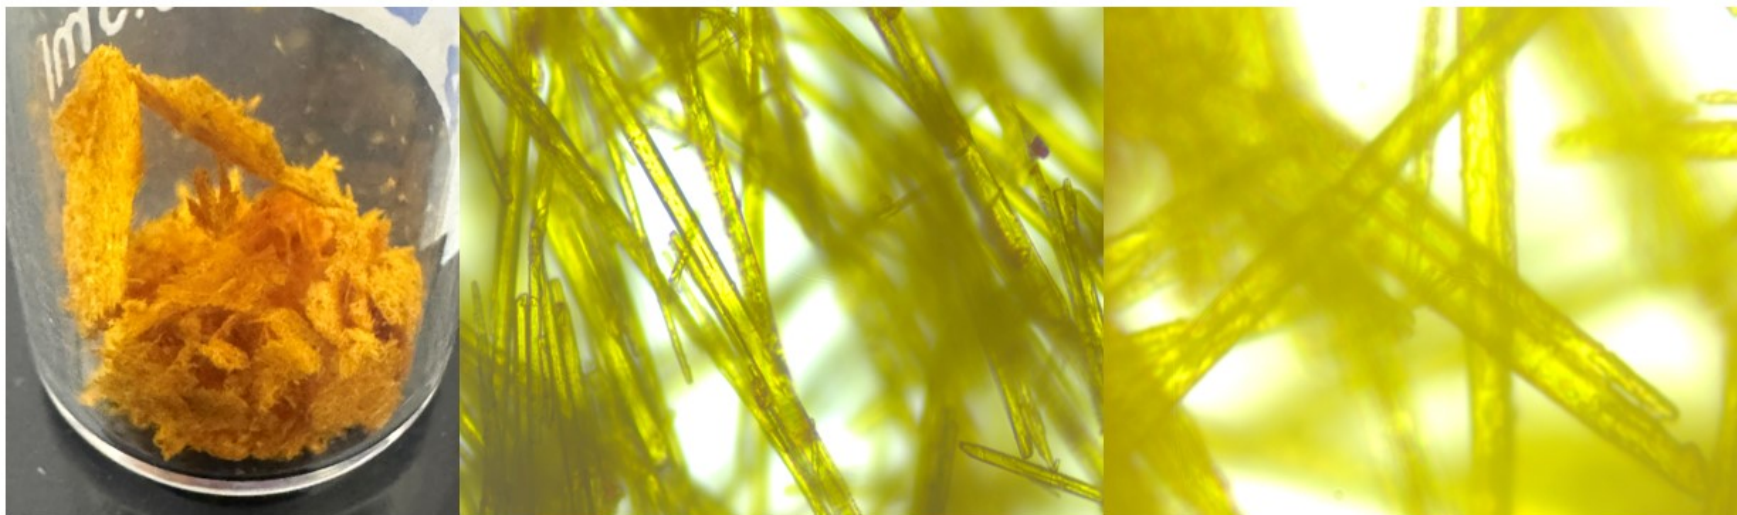

*Figure 9S. Gd-PLB complex was synthesized and crystal micrographed*

# Gd-PLB-C13

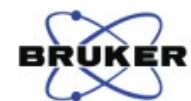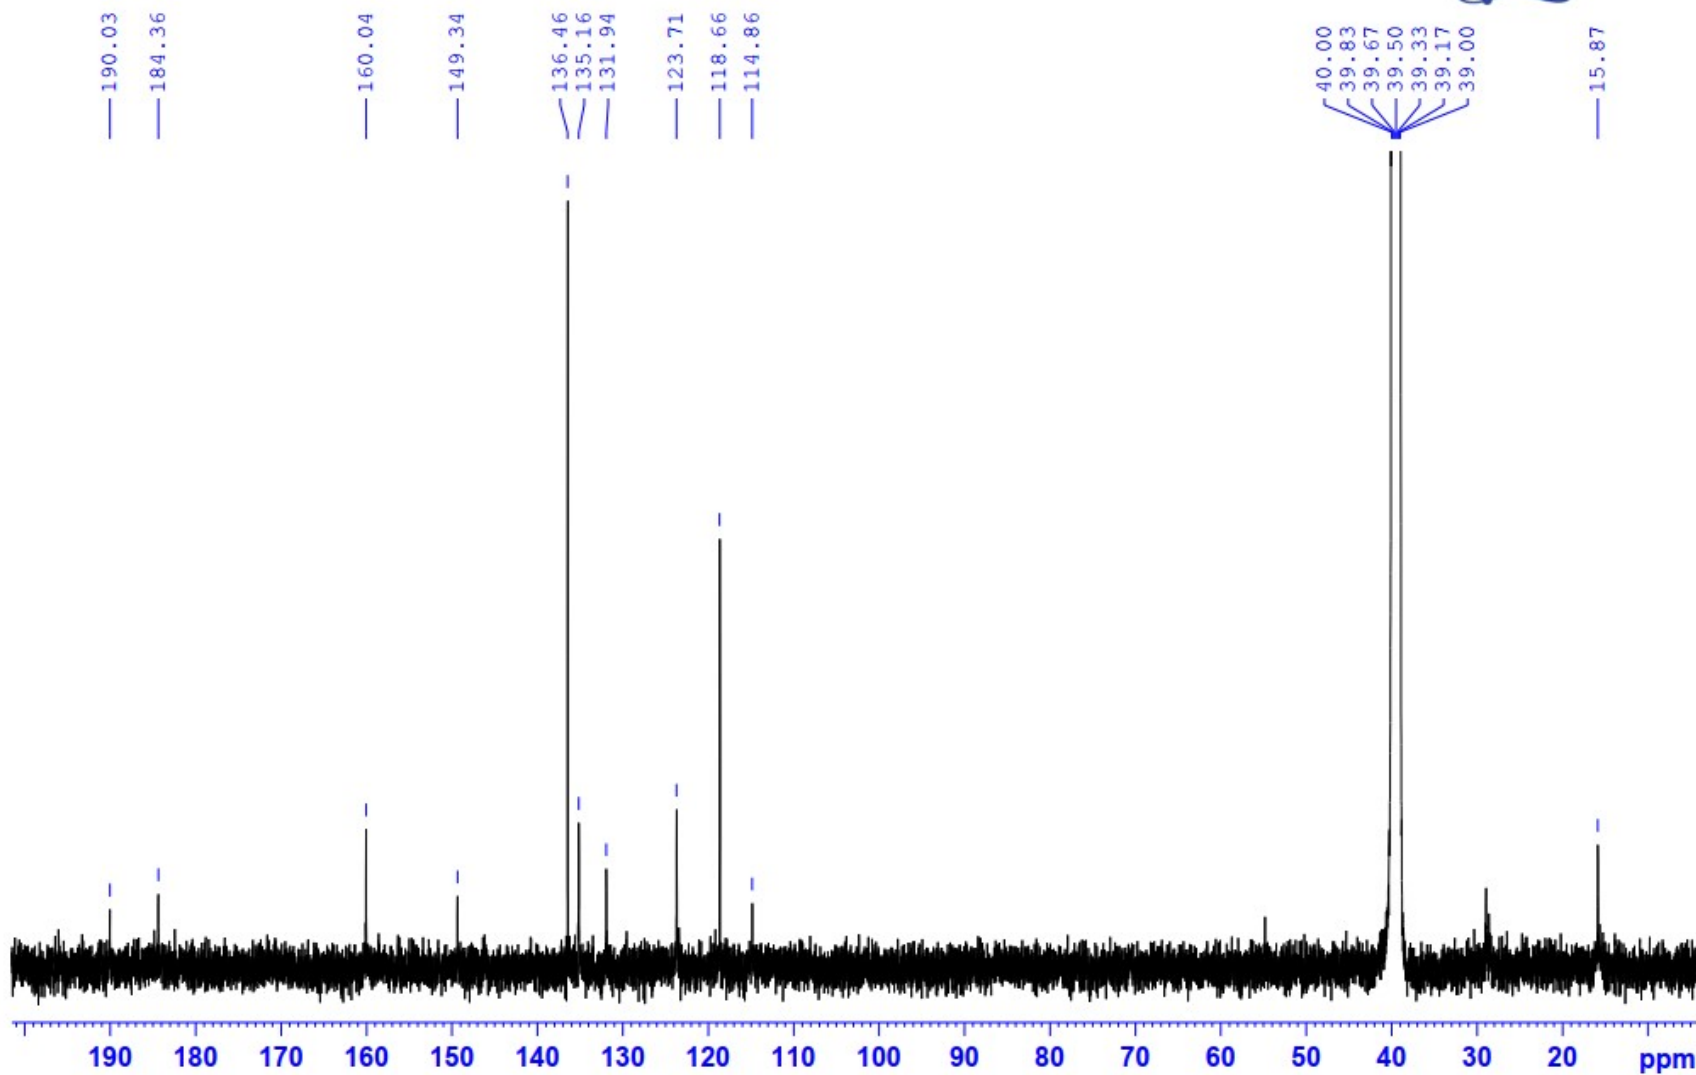

Figure 10S. The  $^{13}\text{C}$ -NMR spectrum of Gd-PLB complex in solid phase

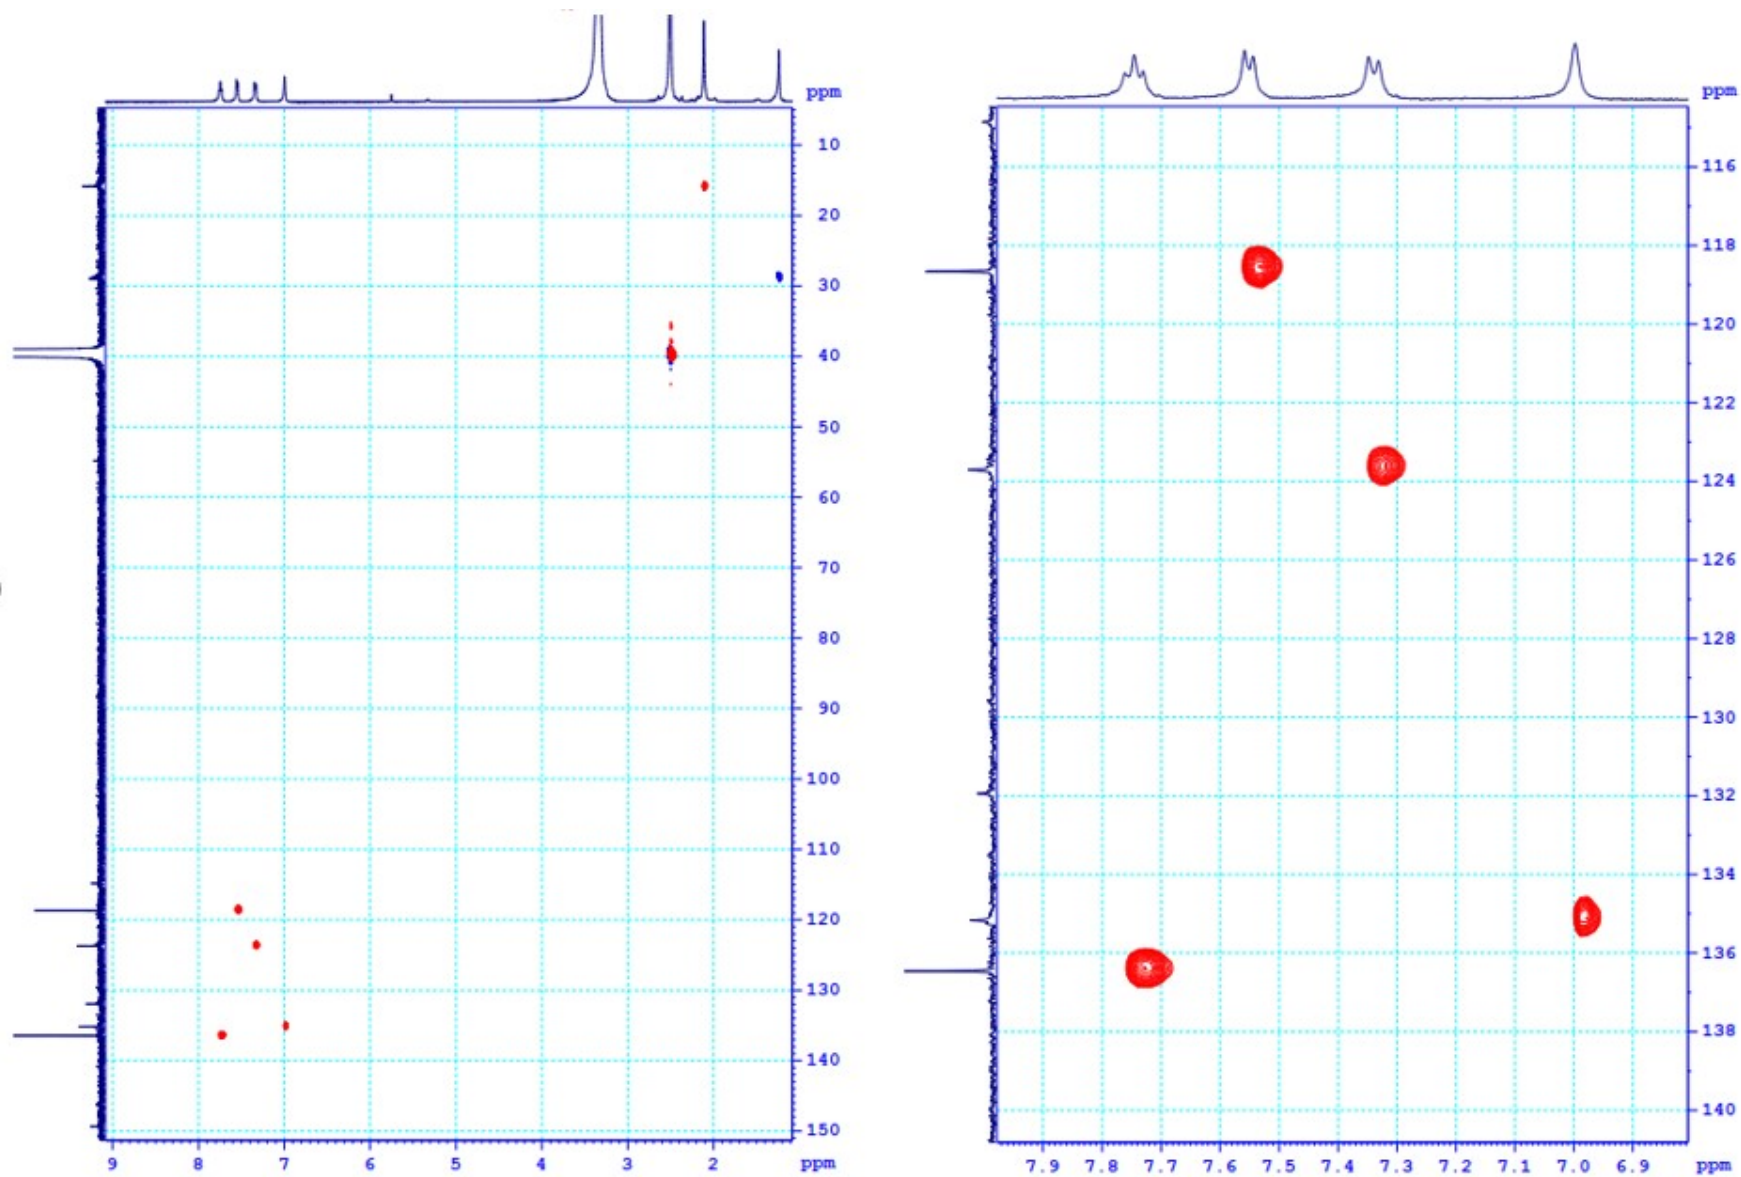

*Figure 11S. The HSQC spectrum of Gd-PLB complex in solid phase*

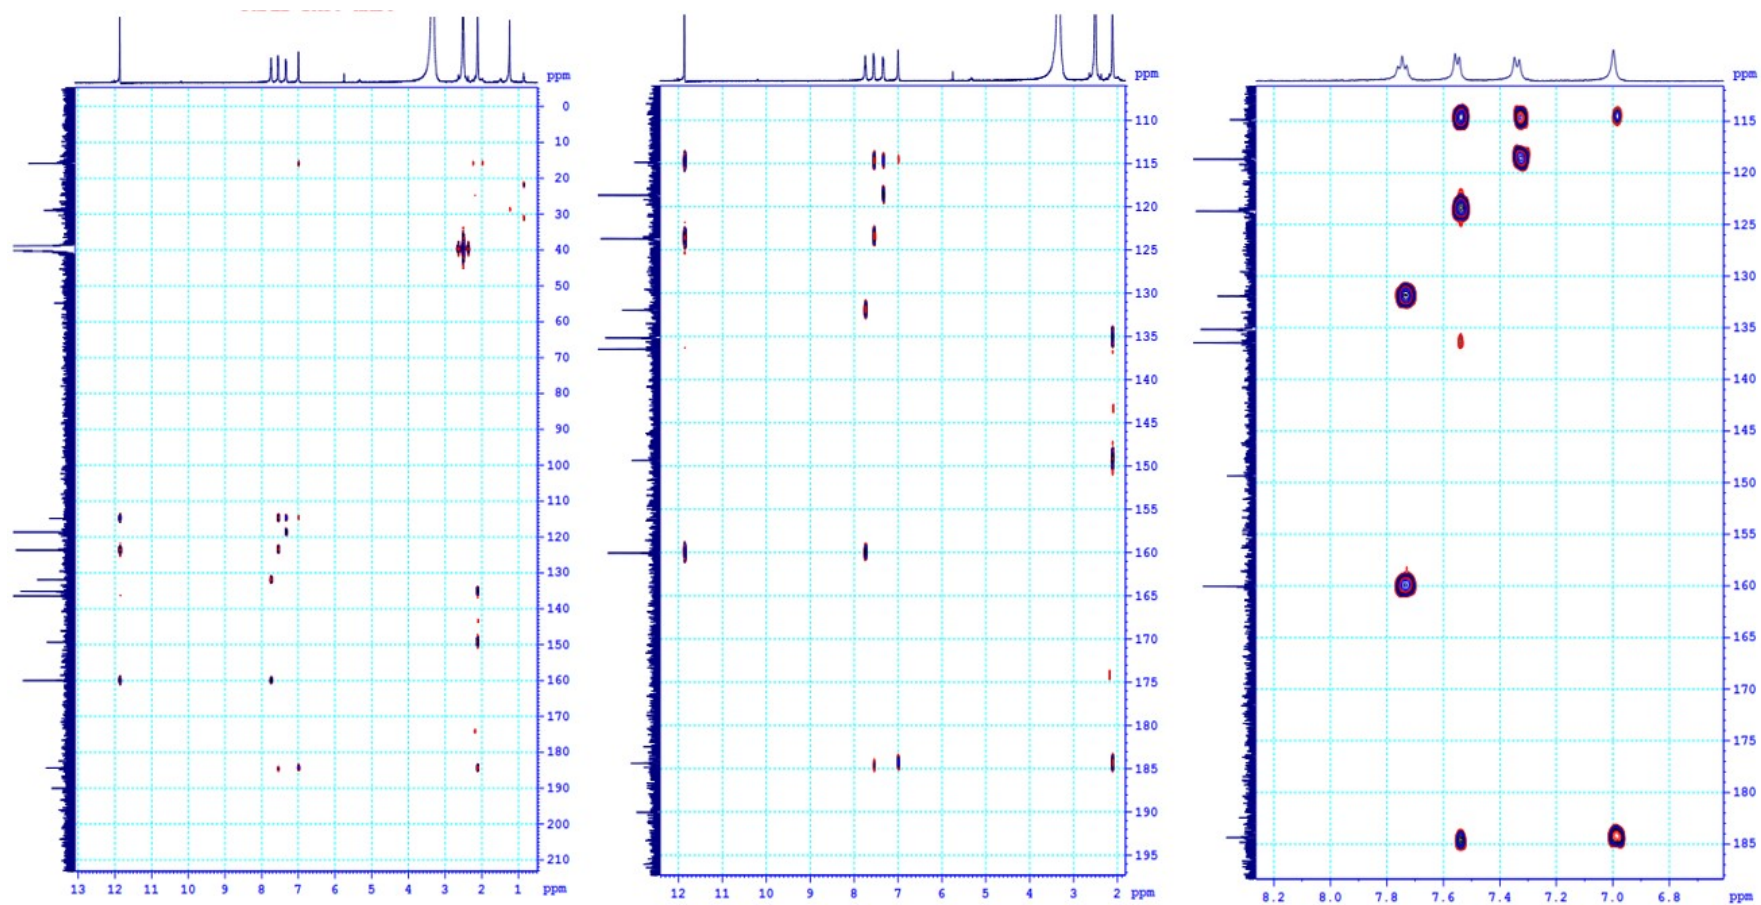

*Figure 12S. The HMBC spectrum of Gd-PLB complex in solid phase*

# Full Mass Spectrum

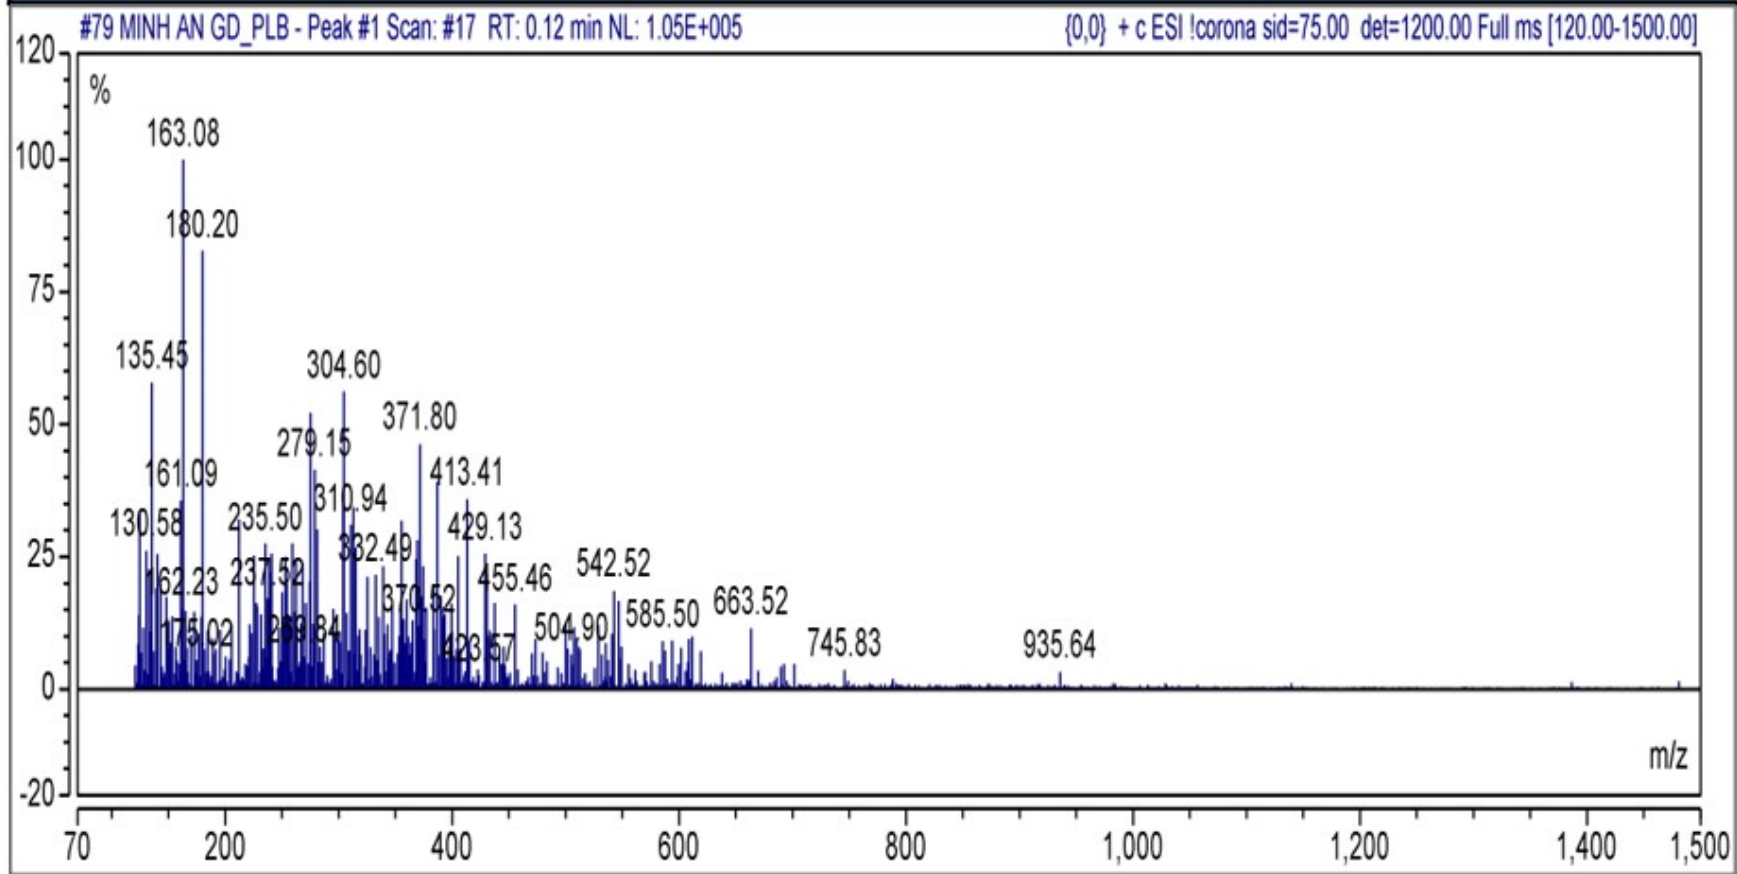

Figure 13S. The ESI-MS spectrum of Gd(PLB)<sub>3</sub> complex in solution

**Table 5S.** Excitation energy and MOs involved in excitation for  $Gd(PLB)_3$  complex at theoretical level B3PW91/def2-SVP (Gd, C, O, H)

| MOs       | Electron transition MO | $E_{\text{HOMO}}$ , eV | $E_{\text{LUMO}}$ , eV | $DE_{\text{gap}}$ , eV | Wavelength,<br>l(nm) | Energy,<br>kcal.mol <sup>-1</sup> |
|-----------|------------------------|------------------------|------------------------|------------------------|----------------------|-----------------------------------|
| 164 → 165 | HOMO → LUMO            | -4.041                 | -3.549                 | 0.492                  | 2520.000             | 11.346                            |
| 163 → 165 | HOMO-1 → LUMO          | -4.576                 | -3.549                 | 1.026                  | 1208.421             | 23.660                            |
| 162 → 165 | HOMO-2 → LUMO          | -6.118                 | -3.549                 | 2.569                  | 482.616              | 59.243                            |
| 161 → 165 | HOMO-3 → LUMO          | -6.183                 | -3.549                 | 2.634                  | 470.706              | 60.741                            |
| 164 → 167 | HOMO → LUMO+2          | -4.041                 | -1.197                 | 2.844                  | 435.949              | 65.584                            |
| 164 → 168 | HOMO → LUMO+3          | -4.041                 | -1.114                 | 2.927                  | 423.587              | 67.498                            |

**Table 6S.** Determination of detection limit and quantification limit of the method

| <b>PBL.VC2</b>                                                  | <b>Symbol</b>      | <b>C-Gd (ppm)</b> | <b>H (%)</b> |
|-----------------------------------------------------------------|--------------------|-------------------|--------------|
| Gd <sub>spike</sub> 1.0 ppm                                     | M1                 | 4.44              | 102.4        |
|                                                                 | M2                 | 4.43              | 100.7        |
|                                                                 | M3                 | 4.41              | 98.7         |
|                                                                 | M4                 | 4.34              | 91.6         |
|                                                                 | M5                 | 4.48              | 105.8        |
|                                                                 | M6                 | 4.31              | 89.3         |
|                                                                 | M7                 | 4.38              | 96.0         |
|                                                                 | Average            | 4.40              | <b>97.8</b>  |
| Calculate and check results                                     | SD                 | 0.059             |              |
|                                                                 | MDL = 3.143*SD     | 0.19              |              |
|                                                                 | LOQ = 3*MDL        | 0.56              |              |
| MDL assessment is calculated through the following 3 conditions |                    |                   |              |
| <b>Condition</b>                                                | <b>Result</b>      | <b>Evaluate</b>   |              |
| MDL < Spike < 10 x MDL                                          | 0.19 < 1.0 < 1.9   | Obtain            |              |
| 80% < H% < 110 %                                                | 80% ≤ 97.8 ≤ 110 % | Obtain            |              |

**Table 7S.** The results of re-confirm the LOQ

| <b>PBL.VC2</b>                                                   | <b>Symbol</b>        | <b>C-Gd (ppm)</b> | <b>H%</b> |
|------------------------------------------------------------------|----------------------|-------------------|-----------|
| Gd <sub>spike</sub> 1.0 ppm                                      | S1                   | 4.44              | 102.1     |
|                                                                  | S2                   | 4.34              | 91.9      |
|                                                                  | S3                   | 4.42              | 100.4     |
|                                                                  | S4                   | 4.39              | 96.6      |
|                                                                  | S5                   | 4.47              | 105.2     |
|                                                                  | S6                   | 4.35              | 92.6      |
|                                                                  | S7                   | 4.41              | 98.7      |
|                                                                  | S8                   | 4.42              | 99.9      |
|                                                                  | S9                   | 4.40              | 98.1      |
|                                                                  | S10                  | 4.44              | 102.2     |
|                                                                  | Average              | 4.41              | 98.8      |
| Calculate and check results                                      | SD                   |                   | 0.042     |
|                                                                  | RSD <sub>r</sub> (%) |                   | 0.95      |
| LOQ assessment was calculated through the following 2 conditions |                      |                   |           |
| <b>Condition</b>                                                 | <b>Result</b>        | <b>Evaluate</b>   |           |
| RSD <sub>r</sub> ≤ C <sup>-0.15</sup>                            | <b>0.95</b> < 1.00   | Obtain            |           |
| 80% < H% < 110 %                                                 | 80% ≤ 98.8 ≤ 110 %   | Obtain            |           |

**Table 8S. Repeatability assessment results table**

| <b>PBL.VC2</b>             | 1        | 2     | 3     | 4     | 5     | 6     | RSD <sub>r</sub> % | Acceptance level |
|----------------------------|----------|-------|-------|-------|-------|-------|--------------------|------------------|
| C <sub>sample</sub>        | 3.42 ppm |       |       |       |       |       |                    |                  |
| C <sub>spike</sub> 1.0 ppm | 4.41     | 4.44  | 4.38  | 4.37  | 4.41  | 4.41  | 0.58               | 7.94             |
| C <sub>spike</sub> 5.0 ppm | 8.46     | 8.32  | 8.40  | 8.43  | 8.46  | 8.43  | 0.64               | 6.24             |
| C <sub>spike</sub> 10 ppm  | 13.30    | 13.11 | 12.84 | 12.81 | 12.87 | 13.13 | 1.53               | 5.62             |

**Table 9S. Table of results of method repeatability assessment**

| <b>PBL.VC2</b>                                        | <b>Low (ppm)</b> |       | <b>Average (ppm)</b> |       | <b>High (ppm)</b> |       |
|-------------------------------------------------------|------------------|-------|----------------------|-------|-------------------|-------|
| Analytical value                                      | 4.41             | 4.41  | 8.46                 | 8.44  | 13.30             | 13.37 |
|                                                       | 4.44             | 4.45  | 8.32                 | 8.32  | 13.11             | 13.15 |
|                                                       | 4.38             | 4.40  | 8.40                 | 8.37  | 12.84             | 13.46 |
|                                                       | 4.37             | 4.40  | 8.43                 | 8.37  | 12.81             | 13.42 |
|                                                       | 4.41             | 4.48  | 8.46                 | 8.44  | 12.87             | 12.97 |
|                                                       | 4.41             | 4.41  | 8.43                 | 8.45  | 13.13             | 13.11 |
| Average per employee, $\bar{y}_{ij}$                  | 4.40             | 4.43  | 8.41                 | 8.40  | 13.01             | 13.25 |
| Standard deviation of each employee, S <sub>ij</sub>  | 0.026            | 0.034 | 0.054                | 0.053 | 0.20              | 0.20  |
| Overall average, $\bar{\bar{y}}_{ij}$                 | 4.42             |       | 8.41                 |       | 13.13             |       |
| Repeatability variance, S <sub>r</sub> <sup>2</sup>   | 0.001            |       | 0.003                |       | 0.039             |       |
| S <sub>d</sub> <sup>2</sup>                           | 0.001            |       | 0.001                |       | 0.169             |       |
| $\bar{n}$                                             | 6                |       | 6                    |       | 6                 |       |
| Variance among employees, S <sub>L</sub> <sup>2</sup> | 0.000            |       | 0.000                |       | 0.022             |       |
| Recurrence variance, S <sub>R</sub> <sup>2</sup>      | 0.001            |       | 0.003                |       | 0.061             |       |

---

|                                              |       |       |       |
|----------------------------------------------|-------|-------|-------|
| Repeatability standard deviation, $S_R$      | 0.032 | 0.06  | 0.25  |
| Repeatability $RSD_R$                        | 0.72  | 0.67  | 1.88  |
| Reproducibility assessment according to AOAC | 15.89 | 12.48 | 11.25 |
| Acceptance level                             |       |       |       |

---

**Table 10S. Recovery assessment results table**

| <b>PBL.VC2</b>             | 1        | 2     | 3     | 4     | 5     | 6     | %Rtb |
|----------------------------|----------|-------|-------|-------|-------|-------|------|
| C <sub>sample</sub>        | 3,42 ppm |       |       |       |       |       |      |
| C <sub>spike</sub> 1.0 ppm | 4.41     | 4.44  | 4.38  | 4.37  | 4.41  | 4.41  | 98.5 |
| R%                         | 98.6     | 102.3 | 96.5  | 94.9  | 99.3  | 99.4  |      |
| C <sub>spike</sub> 5.0 ppm | 8.46     | 8.32  | 8.40  | 8.43  | 8.46  | 8.4   | 99.7 |
| R%                         | 100.8    | 97.9  | 99.5  | 100.1 | 100.8 | 100.2 |      |
| C <sub>spike</sub> 10ppm   | 13.30    | 13.11 | 12.84 | 12.81 | 12.87 | 13.13 | 95.3 |
| R%                         | 98.8     | 96.9  | 94.2  | 93.9  | 94.5  | 97.1  |      |

*Table 11S. Results for determining measurement uncertainty*

| No | Analysis time | Analysis results (ppm) |
|----|---------------|------------------------|
| 1  |               | 4.44                   |
| 2  |               | 4.43                   |
| 3  | Phase 1       | 4.41                   |
| 4  |               | 4.34                   |
| 5  |               | 4.48                   |
| 6  |               | 4.44                   |
| 7  |               | 4.34                   |
| 8  | Phase 2       | 4.42                   |
| 9  |               | 4.39                   |
| 10 |               | 4.47                   |
| 11 |               | 4.35                   |
| 12 |               | 4.41                   |
| 13 | Phase 3       | 4.42                   |
| 14 |               | 4.40                   |
| 15 |               | 4.44                   |
| 16 |               | 4.44                   |
| 17 | Phase 4       | 4.38                   |
| 18 |               | 4.37                   |

---

|                                                 |             |
|-------------------------------------------------|-------------|
| 19                                              | 4.41        |
| 20                                              | 4.41        |
| Sample mean (Xtb)                               | 4.41        |
| Standard deviation (SD)                         | 0.040       |
| Repeatability (CV%)                             | 0.92        |
| Error 10mL (mL)                                 | 0.025       |
| Volume error due to temperature V10mL (mL)      | 0.0048      |
| u(Volume 10) (mL)                               | 0.0113      |
| u(average 10) (%)                               | 0.11        |
| Wavelength error of HITACHI F-2700 machine (nm) | 3.0         |
| u(HITACHI F-2700) (nm)                          | 1.5         |
| u(HITACHI F-2700) (%)                           | 0.30        |
| u (Parameters) (%)                              | 0.32        |
| Total condition (%)                             | 0.97        |
| $t_{\alpha}; k$                                 | 2           |
| <b>Extended OD (%)</b>                          | <b>1.94</b> |

---
